# Supplementary material for: Environmentally Friendly Flexible Strain Sensor from Waste Cotton Fabrics and Natural Rubber Latex
Source: PubMed Central journal article supplement (PMC6473477; doi:10.3390/polym11030404), 2019-03-01
Supplement: polymers-11-00404-s001.pdf [file polymers-11-00404-s001.pdf]

*Supplementary Materials*

# **Environmentally Friendly Flexible Strain Sensor from Waste Cotton Fabrics and Natural Rubber Latex**

**Xinzhu Chen**<sup>1</sup>, **Jing An**<sup>2</sup>, **Guangming Cai**<sup>1</sup>, **Jin Zhang**<sup>3</sup>, **Wu Chen**<sup>1</sup>, **Xiongwei Dong**<sup>1</sup>, **Licheng Zhu**<sup>1</sup>, **Bin Tang**<sup>1,3,\*</sup>, **Jinfeng Wang**<sup>1,3,\*</sup> and **Xungai Wang**<sup>1,3</sup>

<sup>1</sup> National Engineering Laboratory for Advanced Textile Processing and Clean Production, Wuhan Textile University, Wuhan 430073, China; cxz\_wtu@163.com (X.C.); guangmingcai2006@163.com (G.C.); wuchen@wtu.edu.cn (W.C.); xwdong@wtu.edu.cn (X.D.); lichengz84@sina.com (L.Z.); xungai.wang@deakin.edu.au (X.W.)

<sup>2</sup> Zhuhai College of Jilin University, School of Chemical Engineering and New Energy Materials, Zhuhai 519041, China; 15031@jluzh.com

<sup>3</sup> Deakin University, Institute for Frontier Materials, Geelong, VIC 3216, Australia; jin.zhang@deakin.edu.au

\* Correspondence: bin.tang@deakin.edu.au (B.T.); jinfeng.wang@deakin.edu.au (J.W.);  
Tel.: +61-3-5227-2012 (B.T. & J.W.)

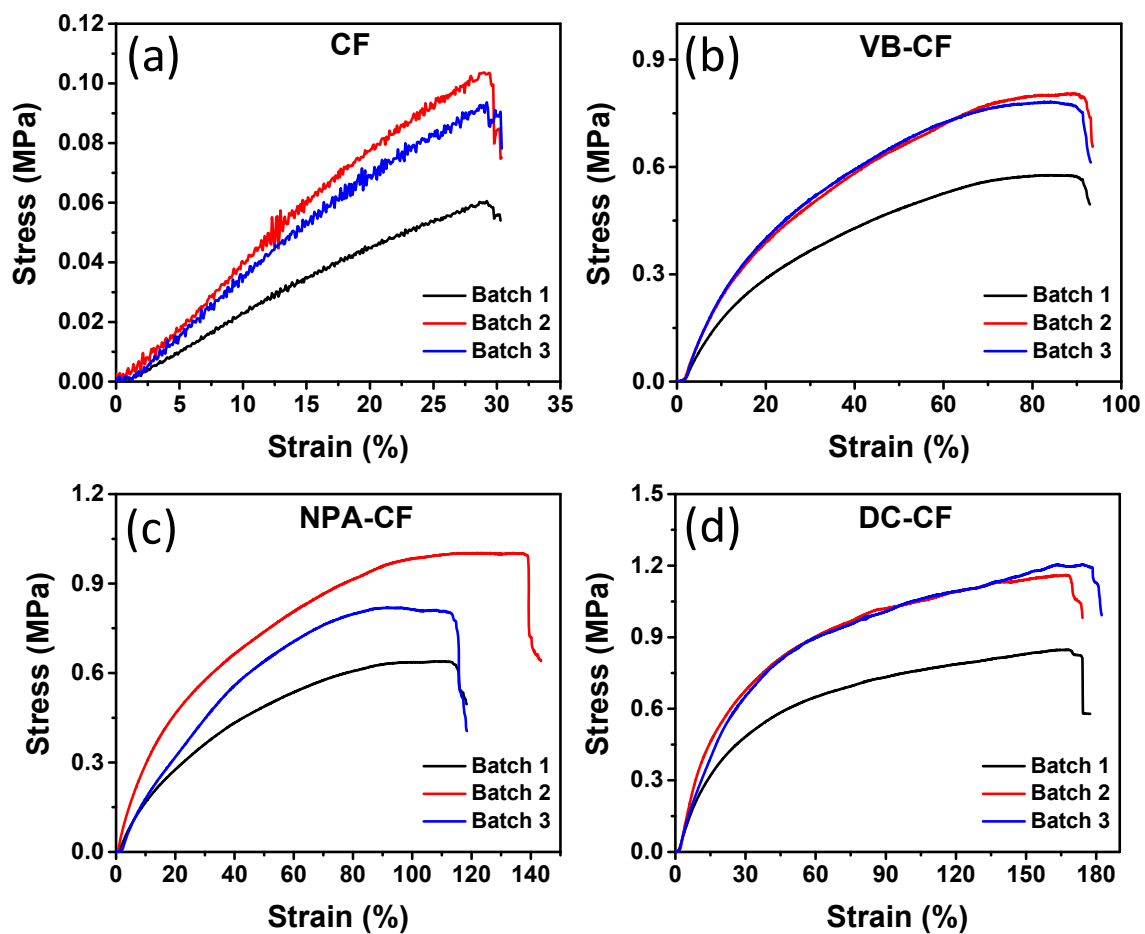

**Figure S1.** Curves of stress versus strain corresponding to the fabric samples from different batches.

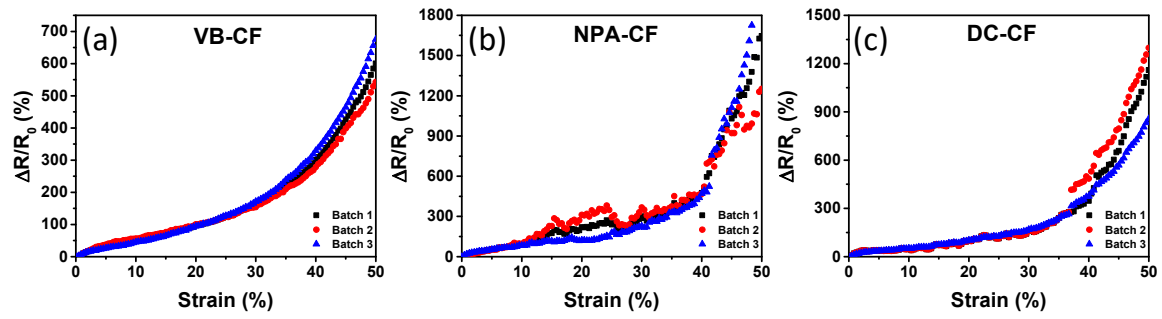

**Figure S2.** Relative resistance variation ( $\Delta R/R_0$ ) under tensile loading for textile composites from different batches.
